# Supplementary material
Source: PubMed Central journal article supplement (PMC3317562)
Supplement: cr201217x3.pdf [file cr201217x3.pdf]

## Supplementary information, Figure S2

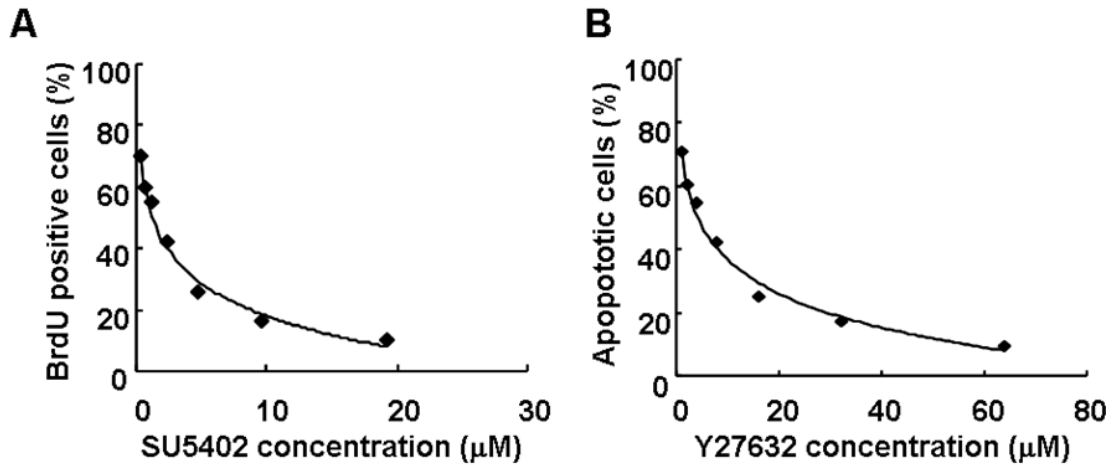

**Figure S2** Dose-dependent inhibition of mSPG mitotic division by SU5402 and apoptosis inhibition by Y27632. **(A)** mSPG were cultured in the sFGF2-devoid medium with different concentrations of SU5402 for 24 h. 10 µg/ml BrdU (Sigma) was subsequently added into the culture medium. After 24 h, mSPG were fixed, and treated with 1N and 2N HCl sequentially. Cells were then incubated with mouse anti-BrdU antibody (BD Biosciences) for flow cytometry analysis. Isotype IgG matching the corresponding primary antibody was used as negative control. The numbers of BrdU positive cells were determined by FACS. The half maximal effective concentration ( $EC_{50}$ ) of SU5402 was determined to be 1.2 µM. Accordingly, 10 µM SU5402 was used as the optimal working concentration for blocking the sFGF2 signaling in the sFGF2-devoid medium for subsequent experiments. **(B)** Dose responsive inhibition of mSPG apoptosis by Y27632. mSPG were cultured in the -F+S medium supplemented with different concentrations of Y27632 for 48 h. mSPG were then TUNEL labeled using the *in situ* cell death detection kit (Roche Applied Science) following the manufacturer's protocol. The numbers of TUNEL positive cells were plotted against the corresponding concentrations of Y27632. The half maximal inhibitory concentration ( $IC_{50}$ ) of Y27632 was determined to be 4.3 µM.
