# Supplementary material
Source: PubMed Central journal article supplement (PMC3317562)
Supplement: cr201217x8.pdf [file cr201217x8.pdf]

**Supplementary information, Table S2** Expression of sFGF2-regulated genes as detected in microarray analysis and confirmed by real-time PCR.

| Class          | Gene         | Regulation | Microarray analysis |         | Real-time PCR |         |
|----------------|--------------|------------|---------------------|---------|---------------|---------|
|                |              |            | change fold         | p value | change fold   | p value |
| apoptosis      | Serpinb2     | up         | 19.4                | 0.001   | 10.3          | 0.002   |
|                | Bak1         | down       | 2                   | 0.002   | 2.4           | 0.004   |
|                | Bok          | down       | 4                   | 0.002   | 5             | 0.002   |
|                | Bcl2         | down       | 6                   | 0.001   | 4             | 0.003   |
|                | Bcl2a1b      | up         | 2                   | 0       | 2.6           | 0.002   |
|                | Bcl2-like 15 | up         | 4                   | 0       |               |         |
| cell cycle     | Cdc6         | up         | 2                   | 0.001   | 2.4           | 0.004   |
|                | Cdc7         | up         | 2.3                 | 0.003   | 2.8           | 0.003   |
|                | Cdca4        | up         | 2                   | 0.003   | 2.4           | 0.003   |
|                | Cdca5        | up         | 2                   | 0.003   |               |         |
|                | Cyclin F     | up         | 2.3                 | >0.05   |               |         |
|                | Cables2      | up         | 2.2                 | >0.05   |               |         |
|                | Map4k2       | up         | 2.2                 | >0.05   | 2.7           | 0.003   |
|                | Mapk8ip2     | up         | 2.6                 | 0       | 3.3           | 0.003   |
|                | n-myc        | up         | 2.4                 | 0.001   | 3             | 0.003   |
|                | Cyclin G1    | down       | 2.3                 | >0.05   |               |         |
|                | Cdk6         | down       | 2.8                 | >0.05   |               |         |
|                | Cdkn2c       | down       | 2.2                 | >0.05   |               |         |
|                | Cables1      | down       | 3.4                 | >0.05   |               |         |
|                | Clk4         | down       | 2.1                 | >0.05   |               |         |
|                | Pten         | down       | 2                   | 0       | 4.3           | 0.003   |
|                | Pink1        | down       | 3.5                 | 0.001   | 4.4           | 0.003   |
| GDNF signaling | Ret          | up         | 2.2                 | 0.002   | 2.7           | 0.003   |
|                | GFRa1        | up         | 1.8                 | >0.05   | 3             | 0.002   |
|                | Lhx1         | up         | 2.2                 | 0       | 2.7           | 0.003   |
|                | ETV5         | up         | 1.7                 | >0.05   |               |         |
|                | Bcl6b        | up         | 1.3                 | >0.05   |               |         |
