# Supplementary material
Source: PubMed Central journal article supplement (PMC3317562)
Supplement: cr201217x9.pdf [file cr201217x9.pdf]

**Supplementary information, Table S3** Functional Annotation Terms (FATs) enriched in genes up- or down-regulated by sFGF2. Analysis was conducted using the DAVID Functional Annotation Clustering (DFAC) web tool. FATs common to both sets were shaded as light blue.

| <b>Set T1. Terms enriched for gene set G1 (732 genes up-regulated by sFGF2 in mSSCs)</b> |                                                                                  |                |                        |
|------------------------------------------------------------------------------------------|----------------------------------------------------------------------------------|----------------|------------------------|
| <b>No.</b>                                                                               | <b>FAT</b>                                                                       | <b>p-Value</b> | <b>Number of Genes</b> |
| 1                                                                                        | GO:0032502~developmental process                                                 | 1.19E-08       | 138                    |
| 2                                                                                        | GO:0006139~nucleobase, nucleoside, nucleotide and nucleic acid metabolic process | 2.12E-08       | 153                    |
| 3                                                                                        | GO:0043283~biopolymer metabolic process                                          | 4.03E-08       | 192                    |
| 4                                                                                        | dna-binding                                                                      | 7.15E-08       | 75                     |
| 5                                                                                        | GO:0044428~nuclear part                                                          | 1.15E-07       | 65                     |
| 6                                                                                        | GO:0007275~multicellular organismal development                                  | 1.21E-07       | 108                    |
| 7                                                                                        | nucleus                                                                          | 1.51E-07       | 142                    |
| 8                                                                                        | GO:0003677~DNA binding                                                           | 2.43E-07       | 101                    |
| 9                                                                                        | GO:0005634~nucleus                                                               | 5.37E-07       | 170                    |
| 10                                                                                       | GO:0065007~biological regulation                                                 | 7.80E-07       | 182                    |
| 11                                                                                       | GO:0050789~regulation of biological process                                      | 1.49E-06       | 168                    |
| 12                                                                                       | GO:0016070~RNA metabolic process                                                 | 1.53E-06       | 118                    |
| 13                                                                                       | Transcription                                                                    | 3.52E-06       | 68                     |
| 14                                                                                       | GO:0031981~nuclear lumen                                                         | 3.75E-06       | 46                     |
| 15                                                                                       | GO:0003676~nucleic acid binding                                                  | 3.88E-06       | 141                    |
| 16                                                                                       | GO:0030528~transcription regulator activity                                      | 4.59E-06       | 68                     |
| 17                                                                                       | GO:0044238~primary metabolic process                                             | 5.12E-06       | 256                    |
| 18                                                                                       | GO:0050794~regulation of cellular process                                        | 5.39E-06       | 153                    |
| 19                                                                                       | GO:0006351~transcription, DNA-dependent                                          | 6.67E-06       | 100                    |
| 20                                                                                       | GO:0032774~RNA biosynthetic process                                              | 7.37E-06       | 100                    |
| 21                                                                                       | PIRSF001950:small inducible chemokine, C/CC types                                | 7.79E-06       | 7                      |
| 22                                                                                       | GO:0030154~cell differentiation                                                  | 9.03E-06       | 86                     |
| 23                                                                                       | GO:0048869~cellular developmental process                                        | 9.03E-06       | 86                     |
| 24                                                                                       | GO:0006350~transcription                                                         | 9.76E-06       | 105                    |

|    |                                                                                                |             |     |
|----|------------------------------------------------------------------------------------------------|-------------|-----|
| 25 | IPR001356:Homeobox                                                                             | 1.01E-05    | 20  |
| 26 | GO:0044451~nucleoplasm part                                                                    | 1.40E-05    | 37  |
| 27 | GO:0043170~macromolecule metabolic process                                                     | 1.55E-05    | 227 |
| 28 | GO:0005667~transcription factor complex                                                        | 1.60E-05    | 31  |
| 29 | GO:0002376~immune system process                                                               | 2.12E-05    | 48  |
| 30 | GO:0006355~regulation of transcription, DNA-dependent                                          | 2.14E-05    | 97  |
| 31 | IPR000827:Small chemokine, C-C                                                                 | 2.24E-05    | 7   |
| 32 | GO:0005654~nucleoplasm                                                                         | 2.37E-05    | 38  |
| 33 | Transcription regulation                                                                       | 2.70E-05    | 64  |
| 34 | GO:0003700~transcription factor activity                                                       | 3.22E-05    | 51  |
| 35 | GO:0045449~regulation of transcription                                                         | 3.36E-05    | 100 |
| 36 | GO:0010468~regulation of gene expression                                                       | 3.89E-05    | 105 |
| 37 | GO:0048731~system development                                                                  | 3.95E-05    | 80  |
| 38 | GO:0019219~regulation of nucleobase, nucleoside, nucleotide and nucleic acid metabolic process | 4.30E-05    | 101 |
| 39 | GO:0044237~cellular metabolic process                                                          | 4.43E-05    | 251 |
| 40 | GO:0048856~anatomical structure development                                                    | 5.73E-05    | 90  |
| 41 | GO:0031974~membrane-enclosed lumen                                                             | 8.05E-05    | 46  |
| 42 | GO:0043233~organelle lumen                                                                     | 8.05E-05    | 46  |
| 43 | Homeobox                                                                                       | 8.73E-05    | 21  |
| 44 | GO:0008152~metabolic process                                                                   | 9.16E-05    | 273 |
| 45 | GO:0031323~regulation of cellular metabolic process                                            | 0.0001124   | 106 |
| 46 | GO:0010467~gene expression                                                                     | 0.000116153 | 127 |
| 47 | IPR012287:Homeodomain-related                                                                  | 0.000157162 | 17  |
| 48 | GO:0019222~regulation of metabolic process                                                     | 0.000196643 | 108 |
| 49 | GO:0046578~regulation of Ras protein signal transduction                                       | 0.000221271 | 14  |
| 50 | GO:0051056~regulation of small GTPase mediated signal transduction                             | 0.000279479 | 16  |
| 51 | GO:0006954~inflammatory response                                                               | 0.000349765 | 18  |
| 52 | GO:0006955~immune response                                                                     | 0.000384717 | 32  |
| 53 | GO:0048513~organ development                                                                   | 0.000397138 | 64  |
| 54 | GO:0042330~taxis                                                                               | 0.000444422 | 12  |
| 55 | GO:0006935~chemotaxis                                                                          | 0.000444422 | 12  |
| 56 | SM00389:HOX                                                                                    | 0.000458126 | 20  |

|    |                                                                  |             |     |
|----|------------------------------------------------------------------|-------------|-----|
| 57 | IPR001811:Small chemokine, interleukin-8-like                    | 0.000646246 | 7   |
| 58 | GO:0009653~anatomical structure morphogenesis                    | 0.000703248 | 55  |
| 59 | GO:0043227~membrane-bound organelle                              | 0.000756108 | 227 |
| 60 | GO:0048468~cell development                                      | 0.000913182 | 56  |
| 61 | GO:0008009~chemokine activity                                    | 0.000940092 | 7   |
| 62 | GO:0043231~intracellular membrane-bound organelle                | 0.000978103 | 226 |
| 63 | GO:0009611~response to wounding                                  | 0.00103914  | 21  |
| 64 | GO:0005083~small GTPase regulator activity                       | 0.00105089  | 16  |
| 65 | GO:0042379~chemokine receptor binding                            | 0.00107868  | 7   |
| 66 | GO:0005622~intracellular                                         | 0.00119825  | 307 |
| 67 | IPR000219:DH                                                     | 0.00129474  | 8   |
| 68 | IPR001849:Pleckstrin-like                                        | 0.00144693  | 16  |
| 69 | GO:0035023~regulation of Rho protein signal transduction         | 0.0014605   | 9   |
| 70 | GO:0009966~regulation of signal transduction                     | 0.00149185  | 26  |
| 71 | GO:0007265~Ras protein signal transduction                       | 0.00162118  | 15  |
| 72 | GO:0005085~guanyl-nucleotide exchange factor activity            | 0.00163847  | 13  |
| 73 | GO:0030695~GTPase regulator activity                             | 0.00191729  | 22  |
| 74 | SM00199:SCY                                                      | 0.00193581  | 7   |
| 75 | IPR000047:Helix-turn-helix motif, lambda-like repressor          | 0.00211506  | 9   |
| 76 | GO:0009792~embryonic development ending in birth or egg hatching | 0.0024379   | 16  |
| 77 | GO:0006950~response to stress                                    | 0.00255186  | 40  |
| 78 | GO:0001664~G-protein-coupled receptor binding                    | 0.00279914  | 8   |
| 79 | IPR001331:Guanine-nucleotide dissociation stimulator, CDC24      | 0.00287039  | 6   |
| 80 | GO:0009887~organ morphogenesis                                   | 0.00331477  | 28  |
| 81 | signal                                                           | 0.00360303  | 99  |
| 82 | GO:0007264~small GTPase mediated signal transduction             | 0.00385481  | 23  |
| 83 | GO:0009790~embryonic development                                 | 0.0038818   | 25  |
| 84 | inflammatory response                                            | 0.00394892  | 8   |
| 85 | SM00325:RhoGEF                                                   | 0.00426803  | 8   |

|     |                                                           |            |     |
|-----|-----------------------------------------------------------|------------|-----|
| 86  | GO:0043234~protein complex                                | 0.0042858  | 73  |
| 87  | GO:0005089~Rho guanyl-nucleotide exchange factor activity | 0.00464166 | 8   |
| 88  | GO:0044424~intracellular part                             | 0.00467809 | 287 |
| 89  | cytokine                                                  | 0.00531529 | 13  |
| 90  | GO:0043009~chordate embryonic development                 | 0.00547599 | 15  |
| 91  | chemotaxis                                                | 0.00613015 | 7   |
| 92  | GO:0030234~enzyme regulator activity                      | 0.00634434 | 35  |
| 93  | GO:0007242~intracellular signaling cascade                | 0.00698364 | 51  |
| 94  | GO:0043229~intracellular organelle                        | 0.00698689 | 245 |
| 95  | SM00233:PH                                                | 0.0073129  | 17  |
| 96  | GO:0043226~organelle                                      | 0.0073143  | 245 |
| 97  | GO:0044421~extracellular region part                      | 0.00796572 | 83  |
| 98  | DNA-binding region:Homeobox                               | 0.00801167 | 13  |
| 99  | GO:0007266~Rho protein signal transduction                | 0.00862147 | 9   |
| 100 | Secreted                                                  | 0.00927875 | 51  |
| 101 | GO:0007610~behavior                                       | 0.0102384  | 19  |
| 102 | GO:0009605~response to external stimulus                  | 0.0103596  | 25  |
| 103 | GO:0005615~extracellular space                            | 0.010534   | 78  |
| 104 | IPR011993:Pleckstrin homology-type                        | 0.0107027  | 15  |
| 105 | GO:0005088~Ras guanyl-nucleotide exchange factor activity | 0.0108857  | 8   |
| 106 | GO:0005102~receptor binding                               | 0.011495   | 32  |
| 107 | GO:0007626~locomotory behavior                            | 0.0117685  | 14  |
| 108 | SH3 domain                                                | 0.0137261  | 13  |
| 109 | GO:0032319~regulation of Rho GTPase activity              | 0.0160441  | 3   |
| 110 | domain:DH                                                 | 0.0164646  | 5   |
| 111 | GO:0009987~cellular process                               | 0.0180404  | 381 |
| 112 | GO:0032991~macromolecular complex                         | 0.0182883  | 83  |
| 113 | GO:0005576~extracellular region                           | 0.0197542  | 86  |
| 114 | guanine-nucleotide releasing factor                       | 0.0198966  | 7   |
| 115 | GO:0008219~cell death                                     | 0.0201319  | 32  |
| 116 | domain:SH3                                                | 0.0202933  | 10  |
| 117 | GO:0016265~death                                          | 0.0214721  | 32  |
| 118 | IPR001452:Src homology-3                                  | 0.0216037  | 12  |
| 119 | GO:0043565~sequence-specific DNA binding                  | 0.0217464  | 24  |
| 120 | GO:0030027~lamellipodium                                  | 0.0241404  | 6   |

| 121                                                                                        | mmu04060:Cytokine-cytokine receptor interaction | 0.0293542 | 15              |
|--------------------------------------------------------------------------------------------|-------------------------------------------------|-----------|-----------------|
| 122                                                                                        | GO:0005125~cytokine activity                    | 0.0433126 | 13              |
| <b>Set T2. Terms enriched for gene set G2 (854 genes down-regulated by sFGF2 in mSSCs)</b> |                                                 |           |                 |
| No.                                                                                        | Annotation                                      | p-Value   | Number of Genes |
| 1                                                                                          | signal                                          | 2.50E-23  | 186             |
| 2                                                                                          | GO:0032502~developmental process                | 1.80E-20  | 194             |
| 3                                                                                          | GO:0007275~multicellular organismal development | 3.24E-20  | 160             |
| 4                                                                                          | GO:0048856~anatomical structure development     | 3.97E-20  | 150             |
| 5                                                                                          | glycoprotein                                    | 2.60E-19  | 197             |
| 6                                                                                          | GO:0022610~biological adhesion                  | 3.80E-18  | 73              |
| 7                                                                                          | GO:0007155~cell adhesion                        | 3.80E-18  | 73              |
| 8                                                                                          | GO:0005576~extracellular region                 | 2.17E-16  | 160             |
| 9                                                                                          | GO:0009653~anatomical structure morphogenesis   | 3.42E-16  | 98              |
| 10                                                                                         | GO:0031012~extracellular matrix                 | 3.49E-16  | 46              |
| 11                                                                                         | GO:0005578~proteinaceous extracellular matrix   | 5.50E-16  | 45              |
| 12                                                                                         | GO:0044421~extracellular region part            | 1.77E-15  | 149             |
| 13                                                                                         | GO:0048731~system development                   | 3.64E-15  | 124             |
| 14                                                                                         | Secreted                                        | 5.72E-15  | 99              |
| 15                                                                                         | GO:0048513~organ development                    | 2.53E-12  | 101             |
| 16                                                                                         | extracellular matrix                            | 7.06E-12  | 31              |
| 17                                                                                         | signal peptide                                  | 9.82E-12  | 154             |
| 18                                                                                         | GO:0005615~extracellular space                  | 1.55E-09  | 125             |
| 19                                                                                         | GO:0044420~extracellular matrix part            | 2.83E-09  | 20              |
| 20                                                                                         | GO:0009887~organ morphogenesis                  | 1.66E-08  | 46              |
| 21                                                                                         | GO:0035295~tube development                     | 2.37E-08  | 27              |
| 22                                                                                         | GO:0035239~tube morphogenesis                   | 2.81E-08  | 22              |
| 23                                                                                         | egf-like domain                                 | 4.69E-08  | 27              |
| 24                                                                                         | glycosylation site:N-linked (GlcNAc...)         | 8.03E-08  | 153             |
| 25                                                                                         | cell adhesion                                   | 9.35E-08  | 35              |
| 26                                                                                         | GO:0032989~cellular structure morphogenesis     | 1.43E-07  | 44              |
| 27                                                                                         | GO:0000902~cell morphogenesis                   | 1.43E-07  | 44              |
| 28                                                                                         | IPR006209:EGF-like                              | 2.20E-07  | 20              |
| 29                                                                                         | IPR001881:EGF-like calcium-binding              | 4.76E-07  | 16              |
| 30                                                                                         | GO:0005604~basement membrane                    | 5.57E-07  | 14              |
| 31                                                                                         | GO:0001822~kidney development                   | 9.88E-07  | 14              |

|    |                                                           |             |     |
|----|-----------------------------------------------------------|-------------|-----|
| 32 | IPR006210:EGF                                             | 1.04E-06    | 23  |
| 33 | disulfide bond                                            | 1.47E-06    | 117 |
| 34 | GO:0001655~urogenital system development                  | 2.90E-06    | 14  |
| 35 | IPR000152:Aspartic acid and asparagine hydroxylation site | 3.09E-06    | 15  |
| 36 | GO:0016010~dystrophin-associated glycoprotein complex     | 7.53E-06    | 7   |
| 37 | IPR000742:EGF-like, type 3                                | 1.16E-05    | 21  |
| 38 | GO:0022008~neurogenesis                                   | 1.32E-05    | 31  |
| 39 | SM00179:EGF_CA                                            | 1.40E-05    | 16  |
| 40 | IPR013032:EGF-like region                                 | 1.40E-05    | 25  |
| 41 | GO:0016477~cell migration                                 | 1.54E-05    | 27  |
| 42 | SM00181:EGF                                               | 1.58E-05    | 24  |
| 43 | GO:0032501~multicellular organismal process               | 2.20E-05    | 186 |
| 44 | GO:0048754~branching morphogenesis of a tube              | 4.34E-05    | 11  |
| 45 | GO:0005605~basal lamina                                   | 5.50E-05    | 8   |
| 46 | GO:0001763~morphogenesis of a branching structure         | 8.59E-05    | 11  |
| 47 | IPR013091:EGF calcium-binding                             | 8.73E-05    | 11  |
| 48 | GO:0001568~blood vessel development                       | 9.40E-05    | 21  |
| 49 | GO:0001944~vasculature development                        | 0.000112787 | 21  |
| 50 | GO:0048514~blood vessel morphogenesis                     | 0.000121241 | 19  |
| 51 | GO:0030182~neuron differentiation                         | 0.000127287 | 25  |
| 52 | GO:0031175~neurite development                            | 0.000133507 | 20  |
| 53 | GO:0006928~cell motility                                  | 0.000139814 | 28  |
| 54 | GO:0051674~localization of cell                           | 0.000139814 | 28  |
| 55 | GO:0048699~generation of neurons                          | 0.000143717 | 27  |
| 56 | GO:0048812~neurite morphogenesis                          | 0.000490235 | 17  |
| 57 | GO:0048667~neuron morphogenesis during differentiation    | 0.000490235 | 17  |
| 58 | GO:0032990~cell part morphogenesis                        | 0.000578295 | 23  |
| 59 | GO:0030030~cell projection organization and biogenesis    | 0.000578295 | 23  |
| 60 | GO:0048858~cell projection morphogenesis                  | 0.000578295 | 23  |
| 61 | GO:0048666~neuron development                             | 0.000606578 | 20  |
| 62 | GO:0000904~cellular morphogenesis during differentiation  | 0.000652186 | 18  |
| 63 | GO:0007409~axonogenesis                                   | 0.000742025 | 16  |

|    |                                            |             |    |
|----|--------------------------------------------|-------------|----|
| 64 | GO:0007411~axon guidance                   | 0.000825205 | 11 |
| 65 | GO:0001656~metanephros development         | 0.00114332  | 8  |
| 66 | GO:0009880~embryonic pattern specification | 0.00146257  | 8  |
| 67 | GO:0001569~patterning of blood vessels     | 0.00166023  | 6  |
| 68 | GO:0048646~anatomical structure formation  | 0.00184639  | 17 |
| 69 | IPR013111:EGF, extracellular               | 0.00413771  | 9  |
| 70 | domain:EGF-like 2; calcium-binding         | 0.00420666  | 7  |
| 71 | GO:0016011~dystroglycan complex            | 0.00446398  | 4  |
| 72 | GO:0001525~angiogenesis                    | 0.00600151  | 13 |
| 73 | domain:EGF-like 4; calcium-binding         | 0.0179139   | 5  |
| 74 | domain:EGF-like 3; calcium-binding         | 0.0179139   | 5  |
| 75 | GO:0001657~ureteric bud development        | 0.0278243   | 5  |
| 76 | GO:0016012~sarcoglycan complex             | 0.0307113   | 3  |
