# Supplementary material
Source: PubMed Central journal article supplement (PMC3317562)
Supplement: cr201217x12.pdf [file cr201217x12.pdf]

**Supplementary information, Table S6** Primer sequences used for real-time PCR

| <b>Primers</b> | <b>Sequences (5'-&gt;3')</b> |
|----------------|------------------------------|
| Bok-s          | CTTGGGAGATGAGCTGGAG          |
| Bok-a          | CCCATGTGATACCTGCTGAG         |
| Bak1-s         | CCAACAGCATCTTGGGTCAG         |
| Bak1-a         | GTAGGCATTCCCGGCTGT           |
| Bcl2ab1-s      | GGTTGGGAAGATGGCTTCAT         |
| Bcl2ab1-a      | CCCAGAACTGTCCTGTCATCT        |
| bcl2-a         | GGGATGCCTTTGTGGA ACTA        |
| bcl2-s         | AGGTATGCACCCAGAGTGATG        |
| Pten-s         | GCTCAAAAAGGACAAAATGTTTCA     |
| Pten-a         | GCAAATGCTATCGATTTCTCTGA      |
| Pink1-s        | AGCAAGAGACCGTCTGCAC          |
| Pink1-a        | TGCTGACTGCTGCAAGAGC          |
| Map4k2-s       | TAGACCCAGGGGACGACAT          |
| Map4k2-a       | TCGGTCATTCTGAGGTAGC          |
| Mapk8ip2-s     | TGCAAAAGATTGCCACAGC          |
| Mapk8ip2-a     | GCTGGAACTCAGGTCCTCCT         |
| Cdc6-a         | TGATCGTGTTGGTGTGGAC          |
| Cdc6-s         | GCAATACCAATGAGCACCAA         |
| Cdca4-s        | CCTGGACAGGATGTTTGCT          |
| Cdca4-a        | GCAGGCTATAGGAAGGGACA         |
| Cdc-7-a        | TAAAAGAGATATTGAGGAGCTTTGTG   |
| Cdc-7-s        | AGGTGCCTTCTCCAATTTTGT        |
| GFRa1-a        | GCAGGCACAGAAGCTGAAAT         |
| GFRa1-s        | TTGTGGTTATGTGGCTGGAG         |
| Ret -s         | CGAGGAAATGTACCGTCTGAT        |
| Ret -a         | AGTCTCTGCTCTTGACCATCATC      |
| Lhx1-s         | TTTACGGAGATTACCAGAGTGAG      |
| Lhx1-a         | GGTAGGTCCACTGGCGTCT          |
| Nmyc-s         | GCGACTCAGATGATGAGGATG        |
| Nmyc-a         | AGTGGTTACCGCCTTGTTGT         |
| Serpib2-s      | TTCAAAGAAGAATACATCCA ACTCTC  |
| Serpib2-a      | GGATTCACCTTTGGTTTGAG         |
| 18s RNA-a      | GCTGAGAAGACGGTTCGAACT        |
| 18s RNA-s      | TAATGATCCTTCCGCAGGT          |
